# Supplementary material for: Genomic Alterations, Gene Expression Profiles and Functional Enrichment of Normal-Karyotype Acute Myeloid Leukaemia Based on Targeted Next-Generation Sequencing
Source: MDPI journal article supplement (doi:10.3390/cancers15051386), 2023-02-22
Supplement: s1 [file s1]

Table SW1. HGC VariantPlex® Myeloid panel

|                   |                   |                   |                  |
|-------------------|-------------------|-------------------|------------------|
| <i>ABL1</i> ▶     | <i>DCK</i> ▶      | <i>KIT</i> ▶      | <i>RPS14</i> ▶   |
| <i>ANKRD26</i> ▶  | <i>DDX41</i> ▶    | <i>KMT2A</i> ▶    | <i>RUNX1</i> ▶ ■ |
| <i>ASXL1</i> ▶ ■  | <i>DHX15</i> ▶    | <i>KRAS</i> ▶     | <i>SF3B1</i> ▶   |
| <i>ATRX</i> ▶     | <i>DNMT3A</i> ▶   | <i>LUC7L2</i> ▶ ■ | <i>SH2B3</i> ▶   |
| <i>BCOR</i> ▶ ■ ♣ | <i>ETNK1</i> ▶    | <i>MAP2K1</i> ▶   | <i>SLC29A1</i> ▶ |
| <i>BCORL1</i> ▶   | <i>ETV6</i> ▶ ■   | <i>MPL</i> ▶      | <i>SMC1A</i> ▶   |
| <i>BRAF</i> ▶     | <i>EZH2</i> ▶ ■   | <i>MYC</i>        | <i>SMC3</i> ▶    |
| <i>BTK</i> ▶      | <i>FBXW7</i> ▶    | <i>MYD88</i> ▶    | <i>SRSF2</i> ▶   |
| <i>CALR</i> ▶     | <i>FLT3</i> ▶ ■ ♣ | <i>NF1</i> ▶ ■    | <i>STAG2</i> ▶   |
| <i>CBL</i> ▶ ■    | <i>GATA1</i> ▶    | <i>NOTCH1</i> ▶   | <i>STAT3</i> ▶   |
| <i>CBLB</i> ▶     | <i>GATA2</i> ▶    | <i>NPM1</i> ▶     | <i>TET2</i> ▶ ■  |
| <i>CBLC</i> ▶     | <i>GNAS</i> ▶     | <i>NRAS</i> ▶     | <i>TP53</i> ▶ ■  |
| <i>CCND2</i> ▶    | <i>HRAS</i> ▶     | <i>PDGFRA</i> ▶   | <i>U2AF1</i> ▶   |
| <i>CDC25C</i> ▶ ■ | <i>IDH1</i> ▶     | <i>PHF6</i> ▶     | <i>U2AF2</i> ▶   |
| <i>CDKN2A</i> ▶ ■ | <i>IDH2</i> ▶     | <i>PPM1D</i> ▶    | <i>WT1</i> ▶ ■   |
| <i>CEBPA</i> ▶    | <i>IKZF1</i> ▶ ■  | <i>PTEN</i> ▶     | <i>XPO1</i> ▶    |
| <i>CSF3R</i> ▶    | <i>JAK2</i> ▶     | <i>PTPN11</i> ▶   | <i>ZRSR2</i> ▶ ■ |
| <i>CUX1</i> ▶ ■   | <i>JAK3</i> ▶     | <i>RAD21</i> ▶ ■  |                  |
| <i>CXCR4</i> ▶    | <i>KDM6A</i> ▶ ■  | <i>RBBP6</i> ▶    |                  |

DNA obtained from patients during the presentation and after attainment of CR1/CR2 were subjected to Archer® HGC VariantPlex® Myeloid panel targeted DNA sequencing that covered 75 hotspot genes (73 single nucleotide variants (SNVs)/indels ▶, 22 copy number variants (CNVs) ■ and two internal tandem duplications (ITDs) ♣).

## Supplementary S1. *ASXL1* NM\_015338.5:c.1934dup (VAF <5%) Validation

| Gene and mutations                    | Dx1  | Dx2  | Dx3  | Dx4  | Dx6  | Dx7     |
|---------------------------------------|------|------|------|------|------|---------|
| <i>ASXL1</i><br>NM_015338.5:c.1934dup | Test | Test | Test | Test | Test | Control |
| Variant allele frequency (%)          | 3.95 | 3.32 | 3.33 | 3.67 | 3.52 | -       |

### 1. Primer Design

| Primer       | Forward               | Reverse                | Insertion Information                   |
|--------------|-----------------------|------------------------|-----------------------------------------|
| <i>ASXL1</i> | GGTTAAAGGTCAGCCCACTTA | CAGTAGTTGTGTTCGCTGTAGA | COSM1411076<br>c.1934dup<br>(Insertion) |

### 2. PCR Reaction Methodology

The PCR master mix used for primer optimisation and reaction was Phusion PCR Master Mix (Thermo). Setup of mastermix as below:

| PCR master mix            | 1X (20ul)<br>optimisation | 2X (20ul)<br>Sanger seq |
|---------------------------|---------------------------|-------------------------|
| 2x Phusion PCR master mix | 10                        | 10                      |
| Forward Primer (10uM)     | 1                         | 1                       |
| Reverse Primer (10uM)     | 1                         | 1                       |
| nuclease-free water       | 6                         | 6                       |
| DNA (40ng)                | 2                         | 2                       |

### Primer optimisation:

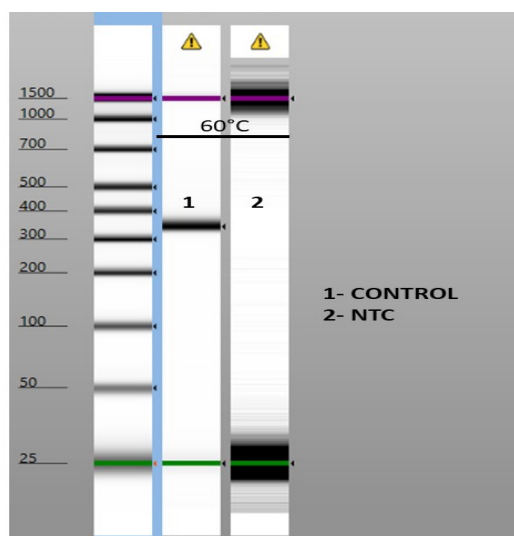

Conclusion: Proceed with 60°C annealing temperature

### PCR for Sanger sequencing:

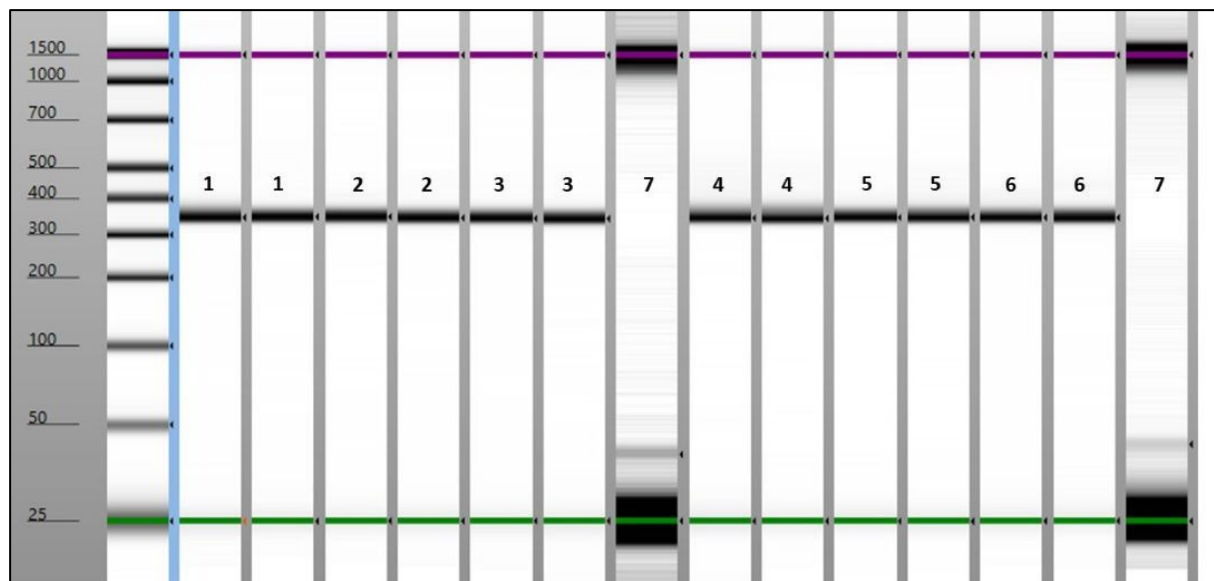

| Lane | Sample        |
|------|---------------|
| 1    | DX1           |
| 2    | DX2           |
| 3    | DX3           |
| 4    | DX4           |
| 5    | DX6           |
| 6    | DX7 (Control) |

### 3. PCR Product Purification for Sanger Sequencing

Kit: Geneall Exspin PCR SV (103-102)

The protocol was as per the manufacturer's recommendation, and proceeded with DNA sequencing.

### 4. Sanger Sequencing Analysis

*ASXL1* - c.1934dup (Insertion)

| Sample        | c.1934dup (Insertion) |
|---------------|-----------------------|
| DX1           | No insertion detected |
| DX2           | No insertion detected |
| DX3           | No insertion detected |
| DX4           | No insertion detected |
| DX6           | No insertion detected |
| DX7 (Control) | No insertion detected |

## Results

### 1. DX7\_P control sample

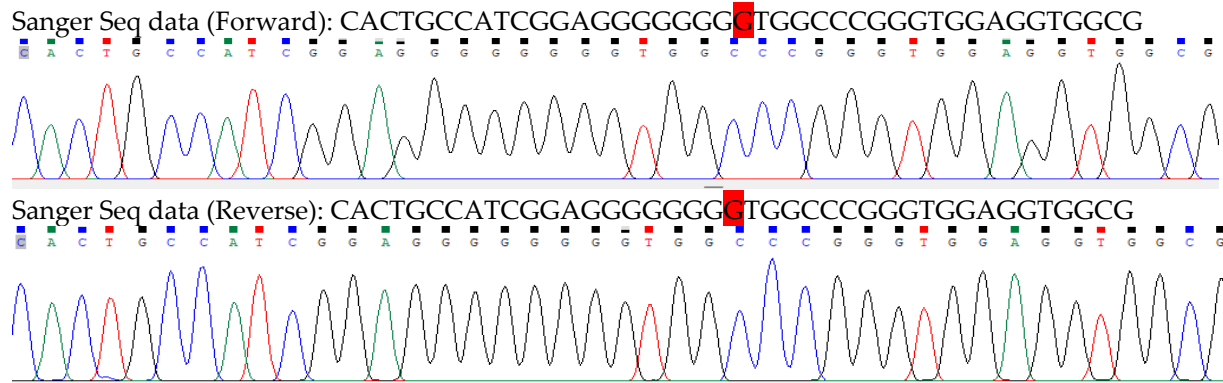

### 2. DX1\_P - No insertion detected

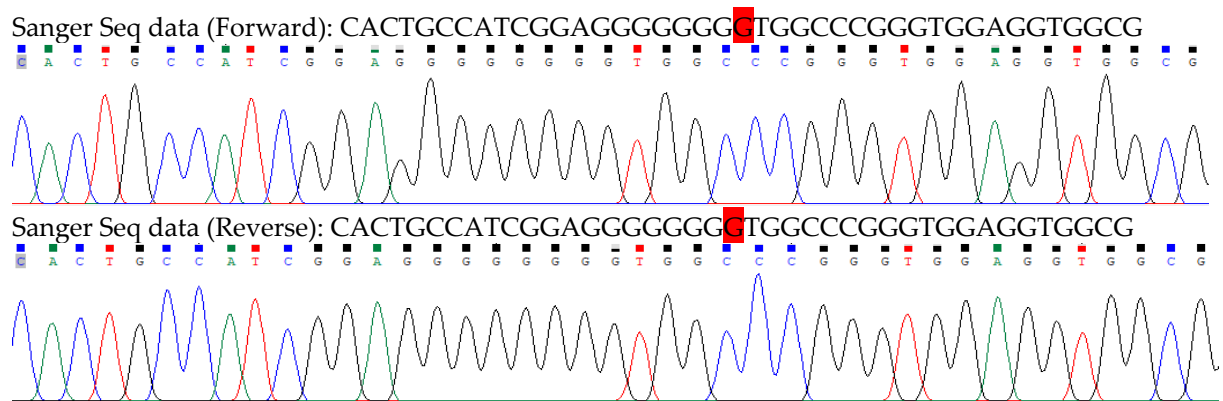

### 3. DX4\_P- No insertion detected

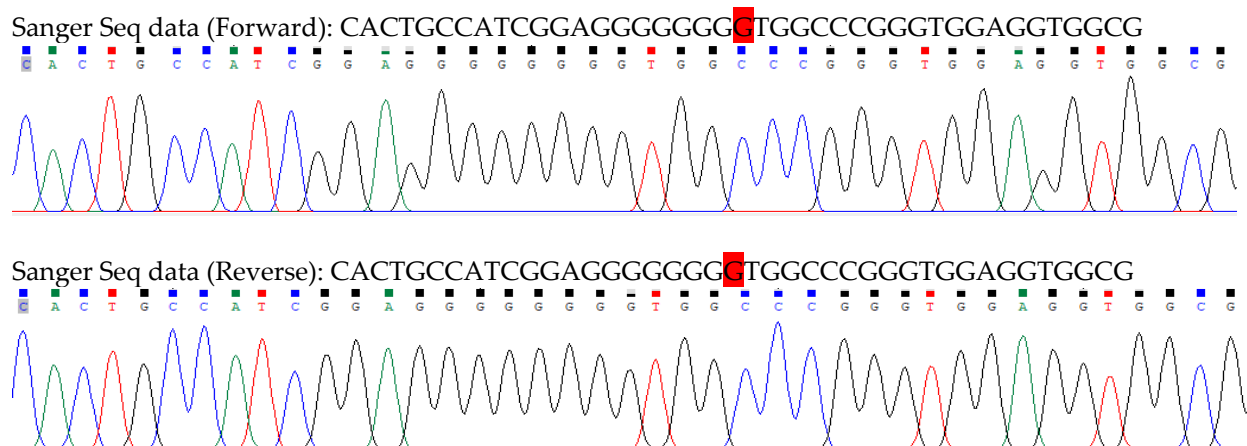

#### 4. DX6\_P - No insertion detected

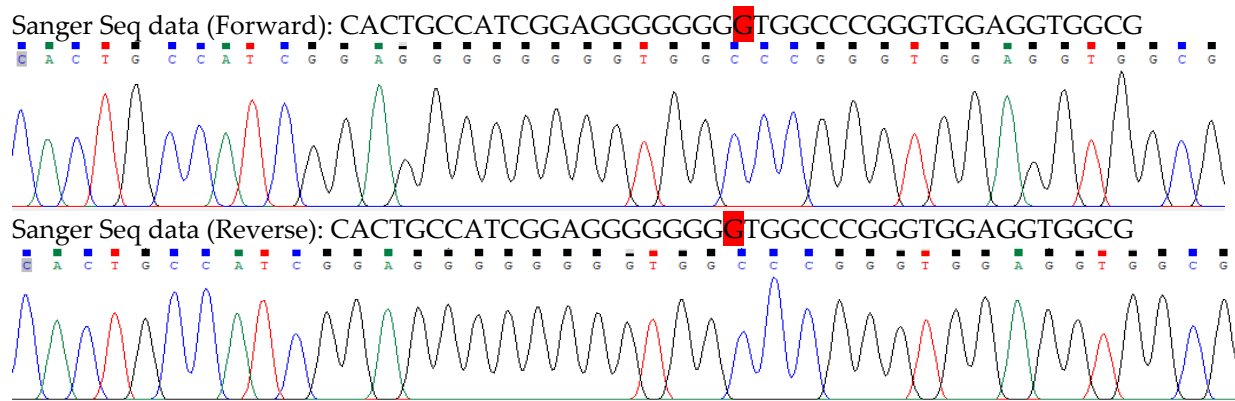

#### 5. DX3\_P - No insertion detected

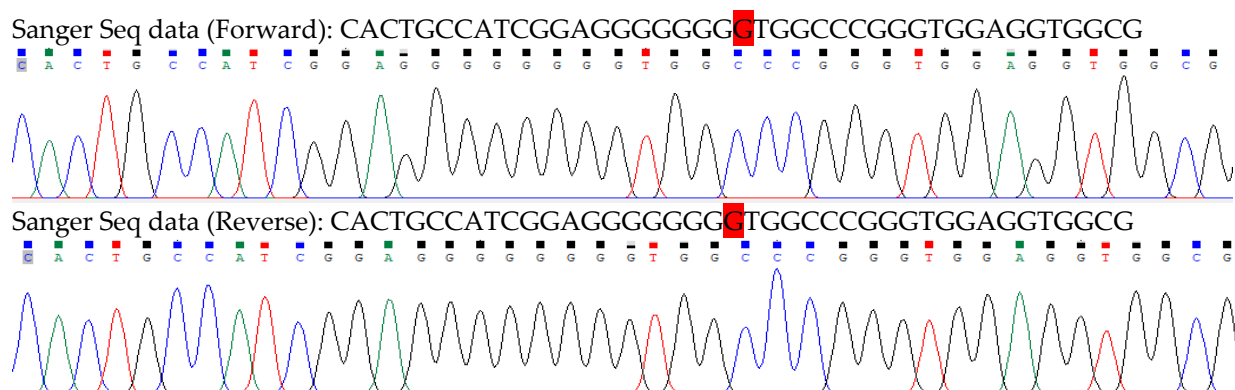

#### 6. DX2\_P - No insertion detected

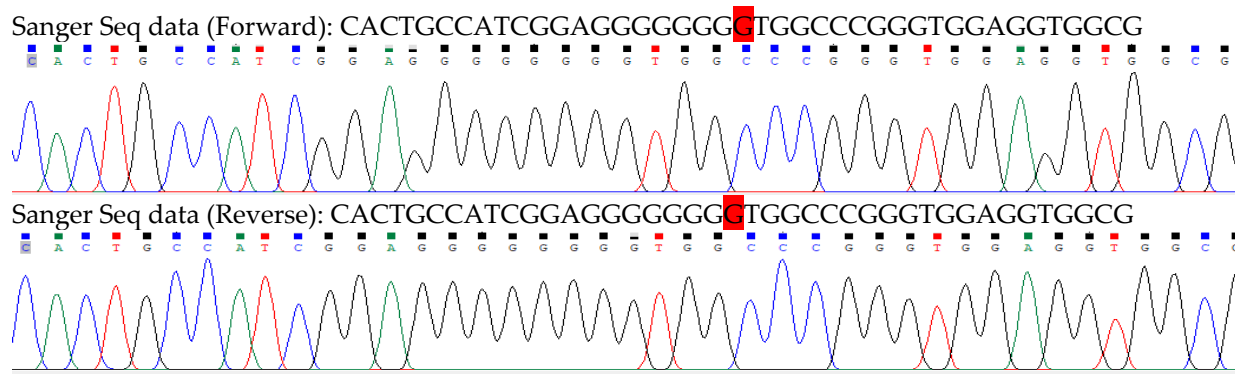

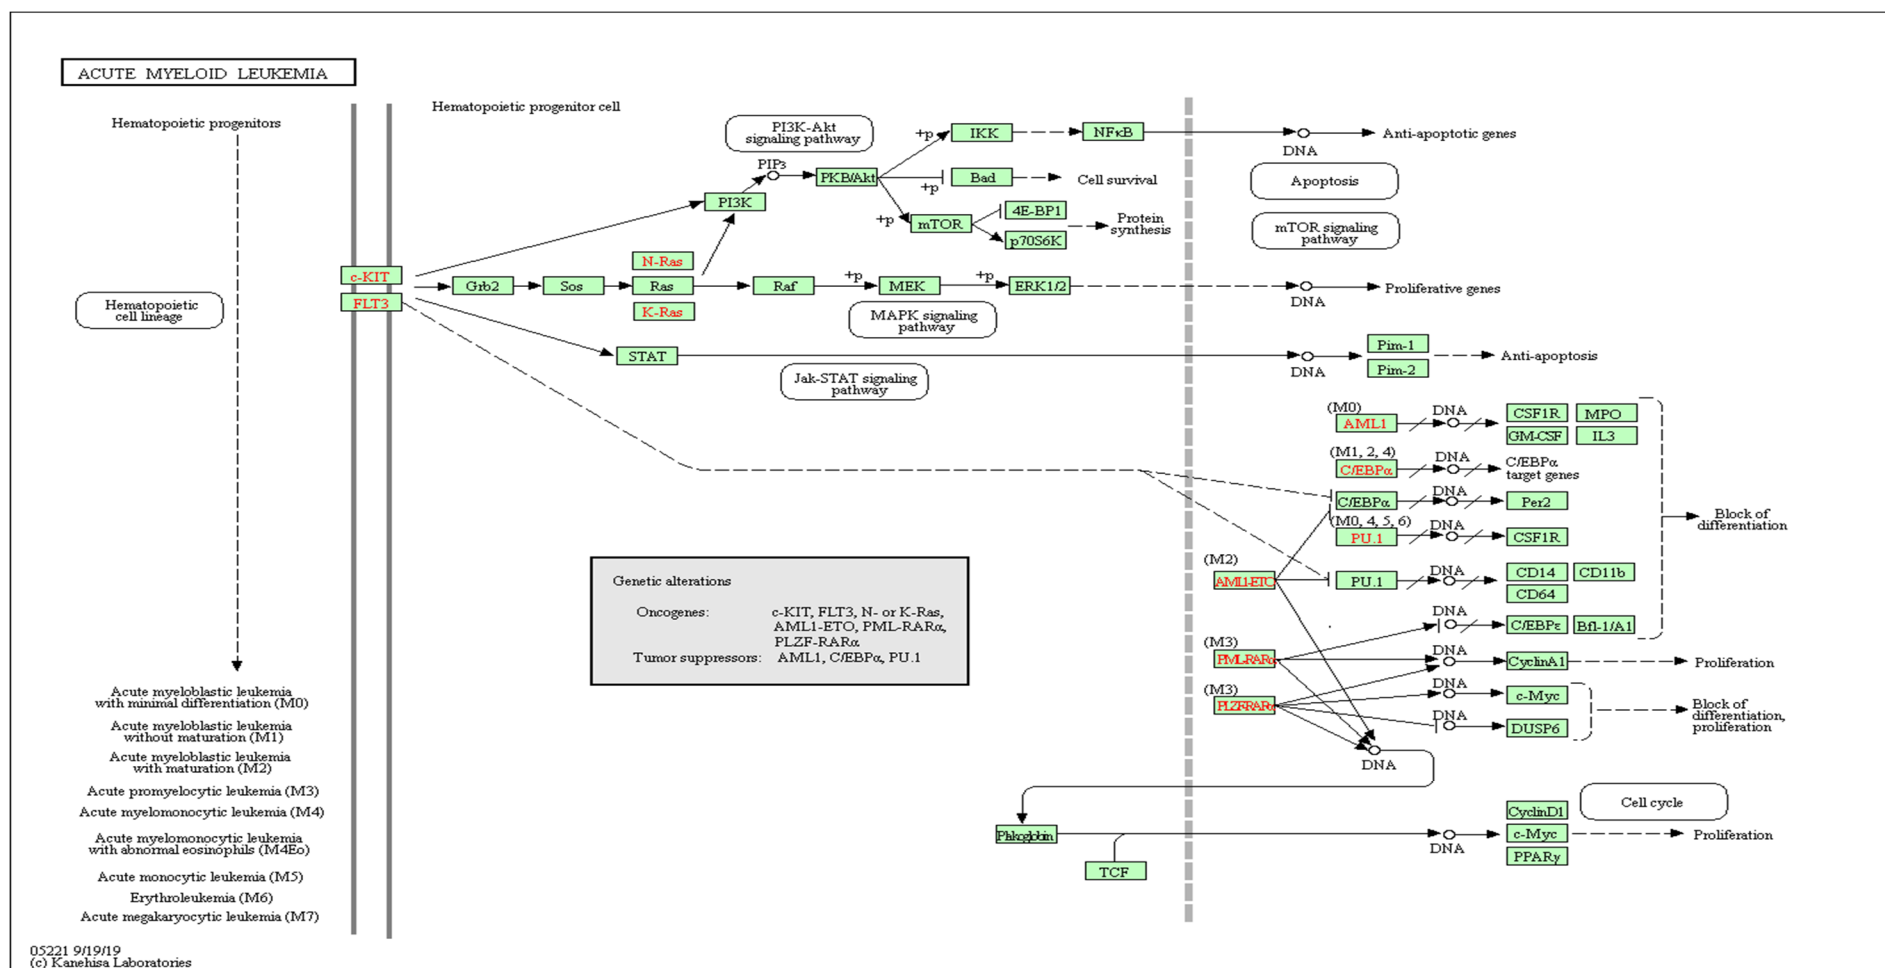

**Figure SW1.** Acute myeloid leukaemia pathway. Genes that are affected are highlighted in red in the diagram. As shown, genes that are located upstream of this pathway were involved, including *FLT3*, *HRAS* and *RUNX1* in selected patients (Dx 1-8), as shown in Table 1, and Figure 4. (Image from KEGG resource)

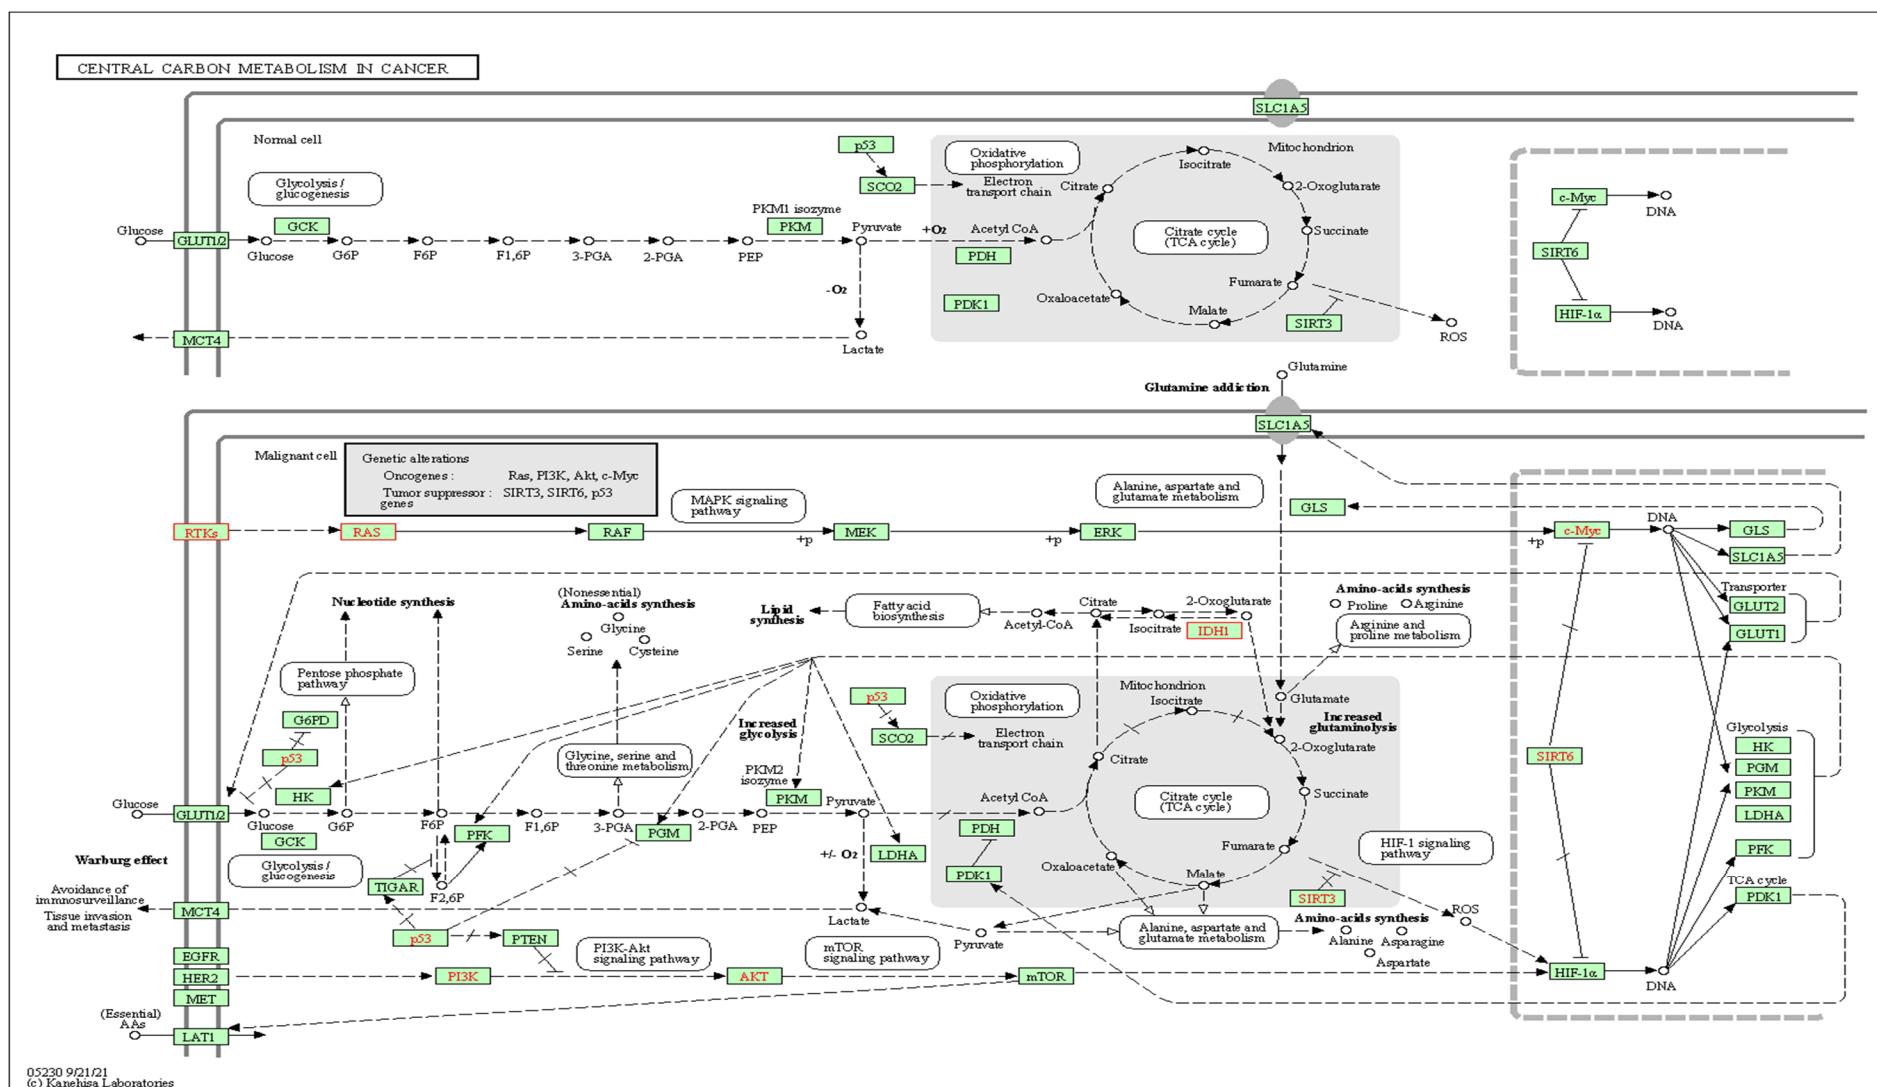

**Figure SW2.** Central carbon metabolism in cancer. Genes that are affected are highlighted in red in the diagram. The *HRAS* (RAS family gene) is located upstream of the MAPK signalling pathway, and several other genes, including *IDH1*, are located downstream of carbon metabolism processes.  
(Image from KEGG resource)

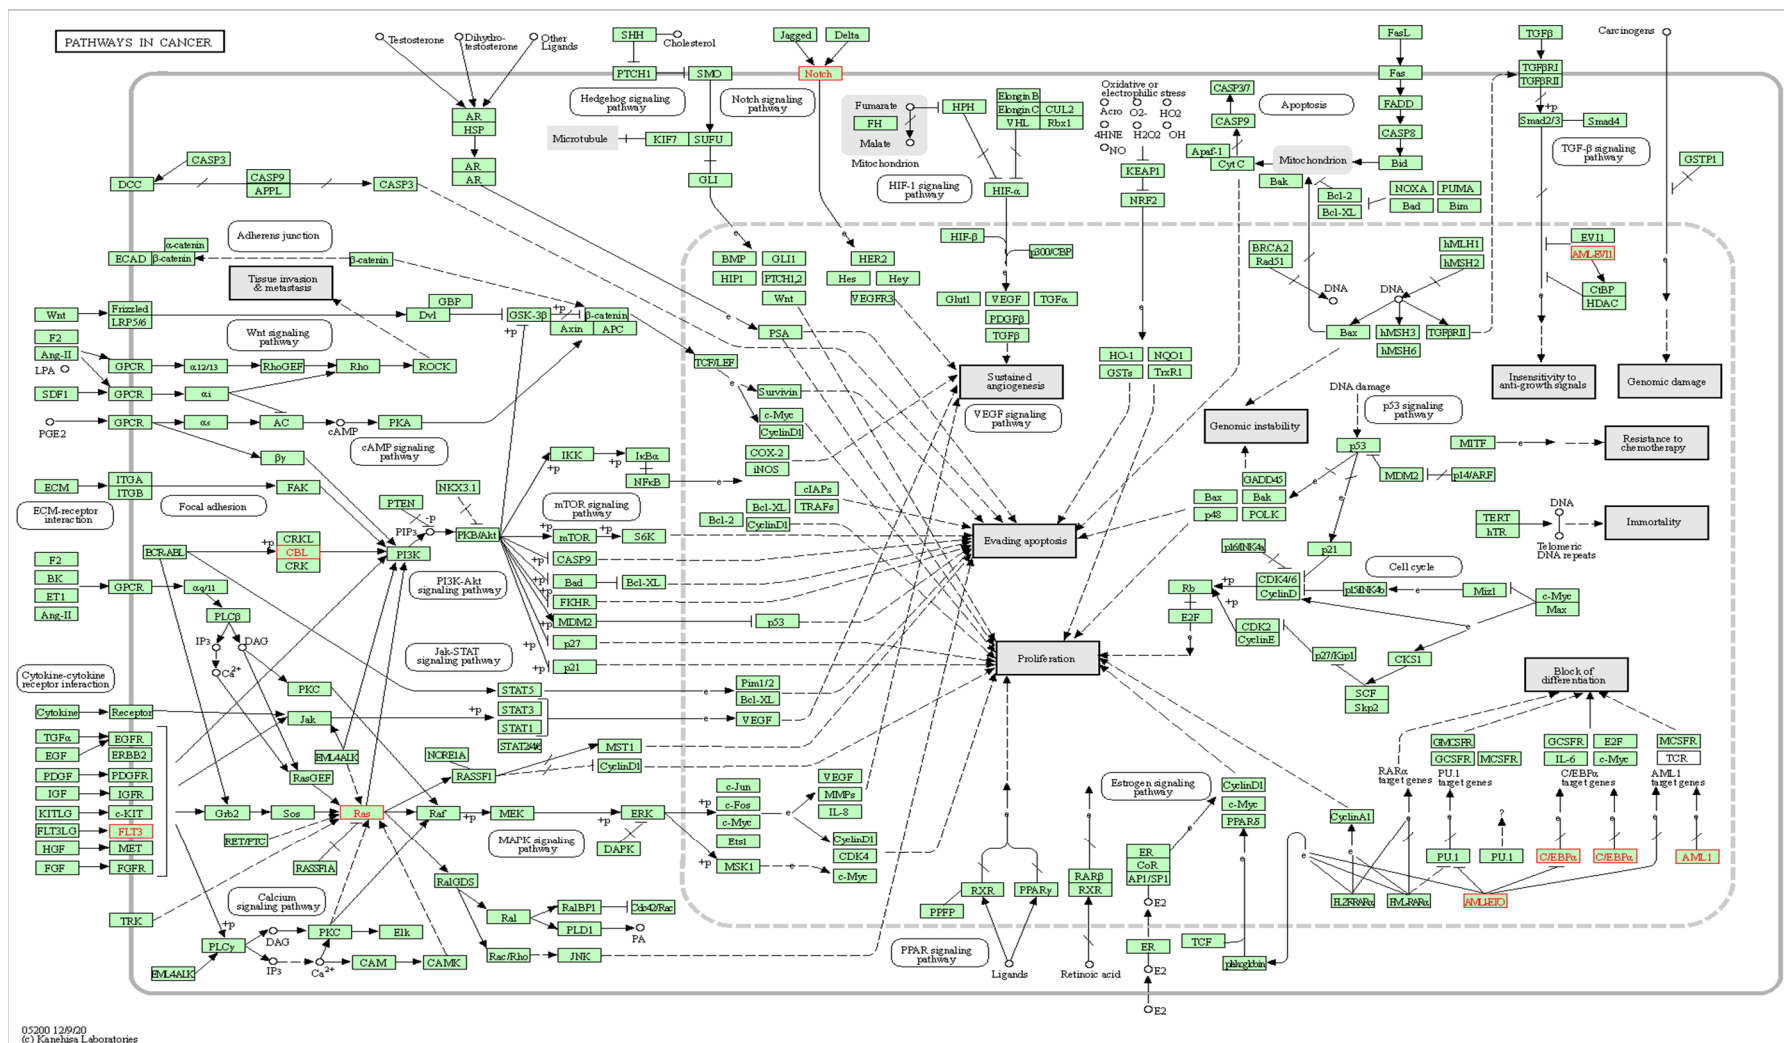

**Figure SW3.** Pathways in Cancer. Genes that are affected are highlighted in red in the diagram. Several hub genes at the intersection of various pathways were involved, including *FLT3* (known hub-gene), *HRAS* and *RUNX1*, which significantly impact the leukaemogenesis of AML-NK in this study. (Image from KEGG resource)

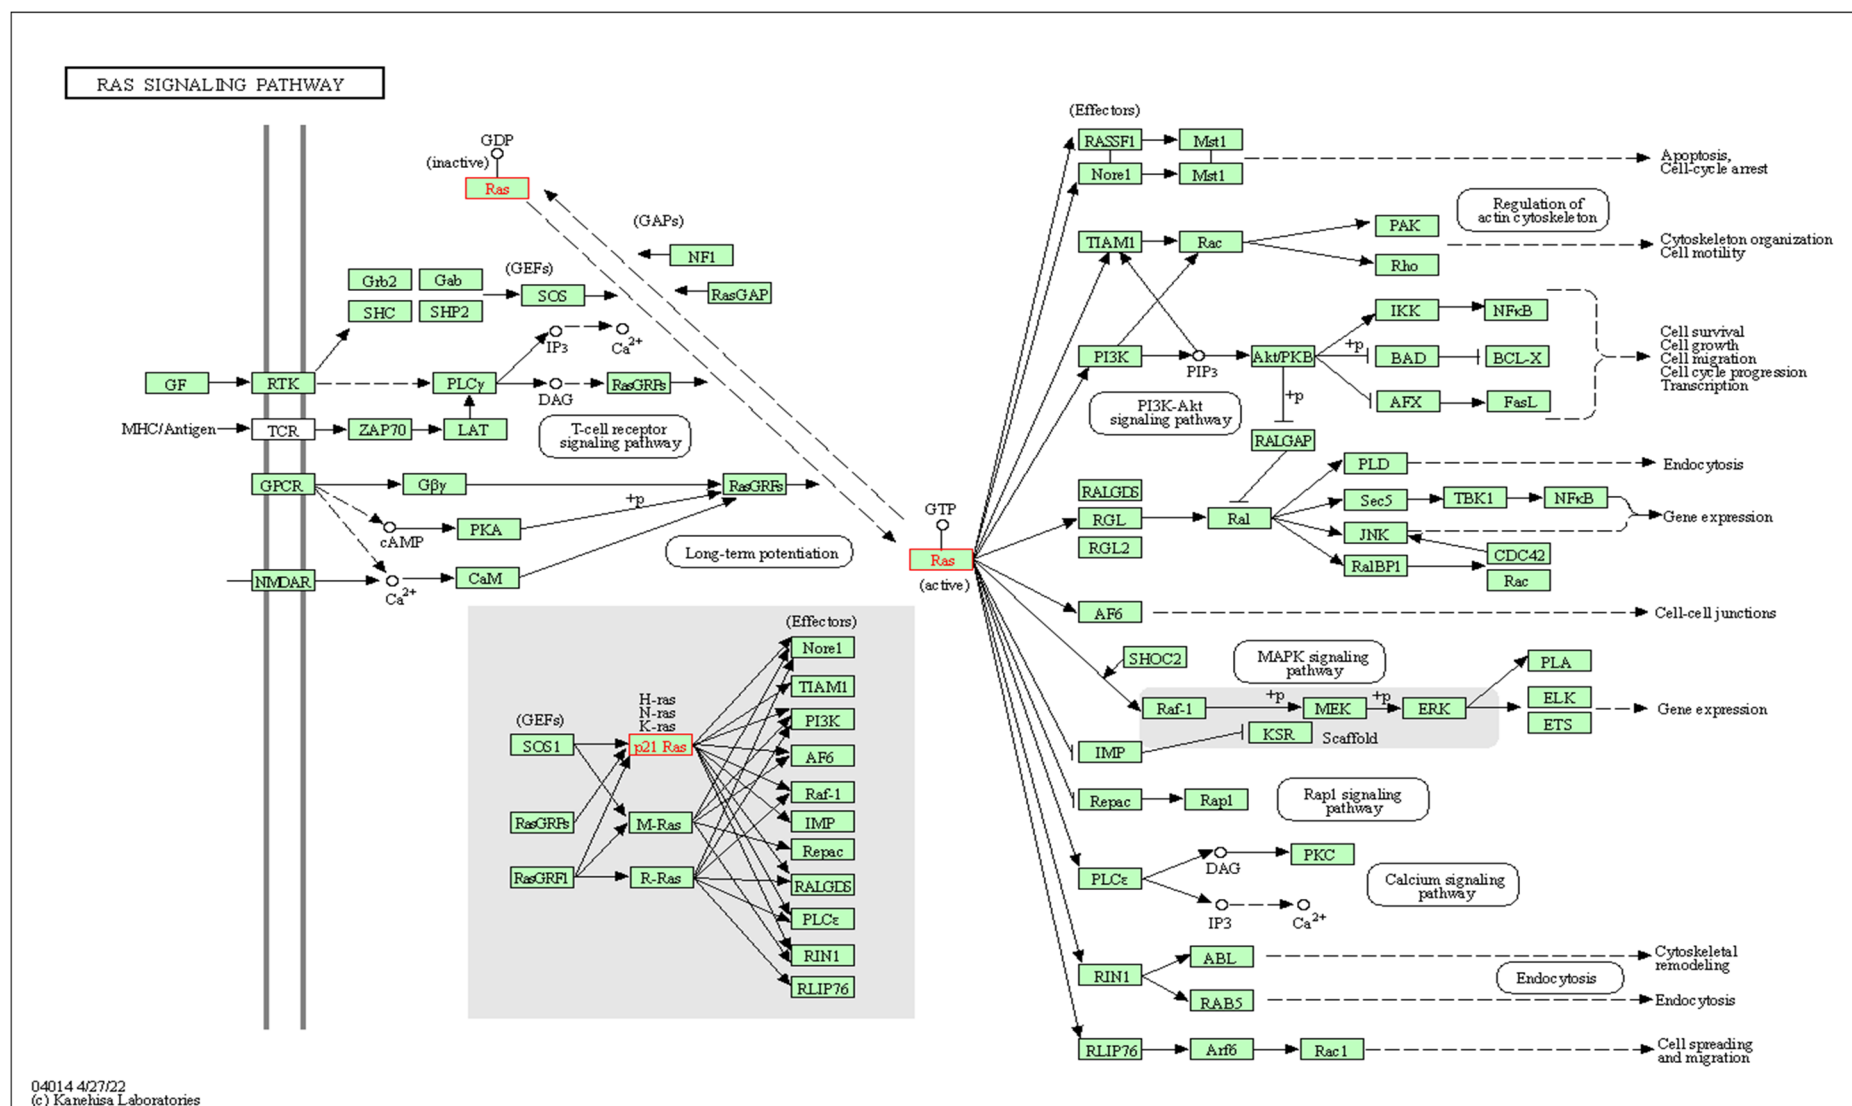

04014 4/27/22  
(c) Kanehisa Laboratories

**Figure SW4.** RAS signalling pathway. *HRAS* gene (RAS gene family) is a critical hub gene involved in several signalling pathways, as shown in this diagram. (Image from KEGG resource)

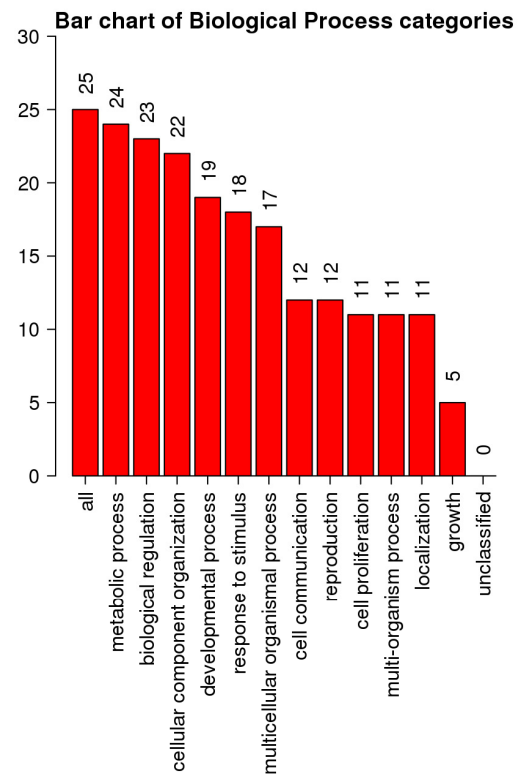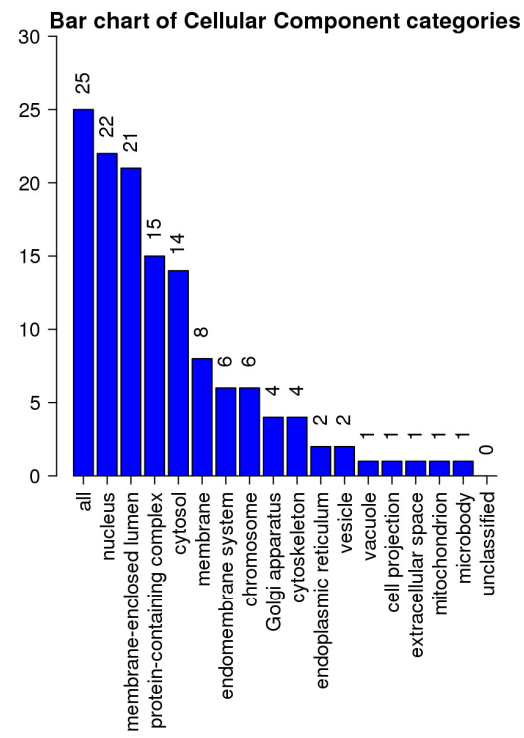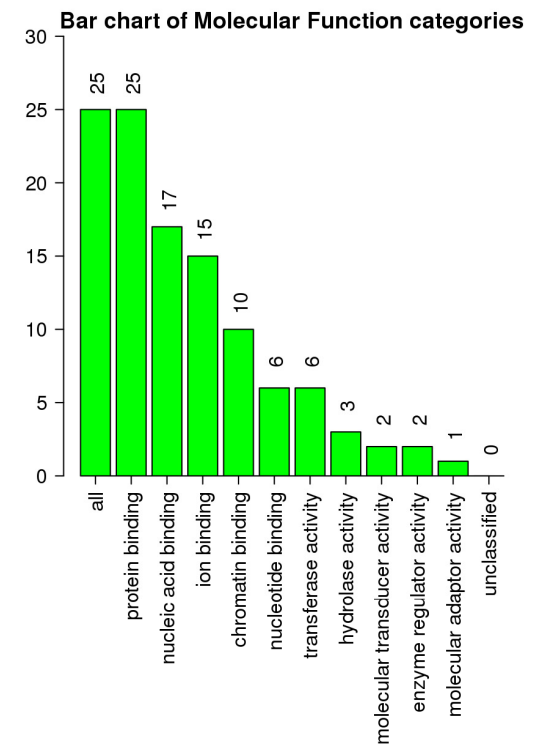

**Figure SW5.** Gene Ontology (GO) summary for the 26 genes with somatic variants

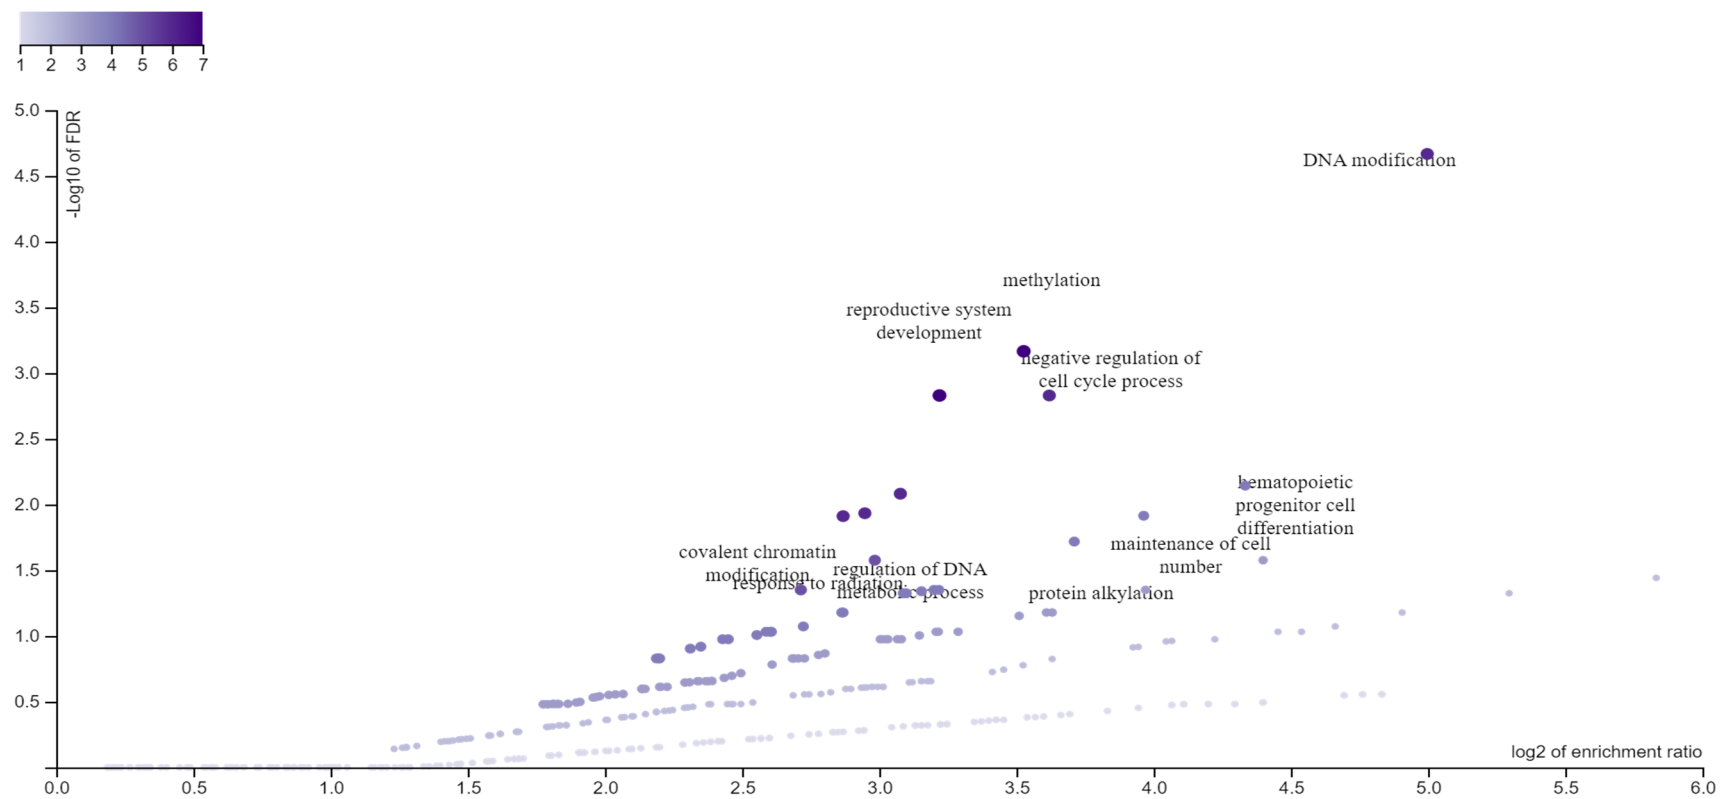

**Figure SW6.** Volcano plot depicting Biological Process GO for the 26 genes with somatic variants

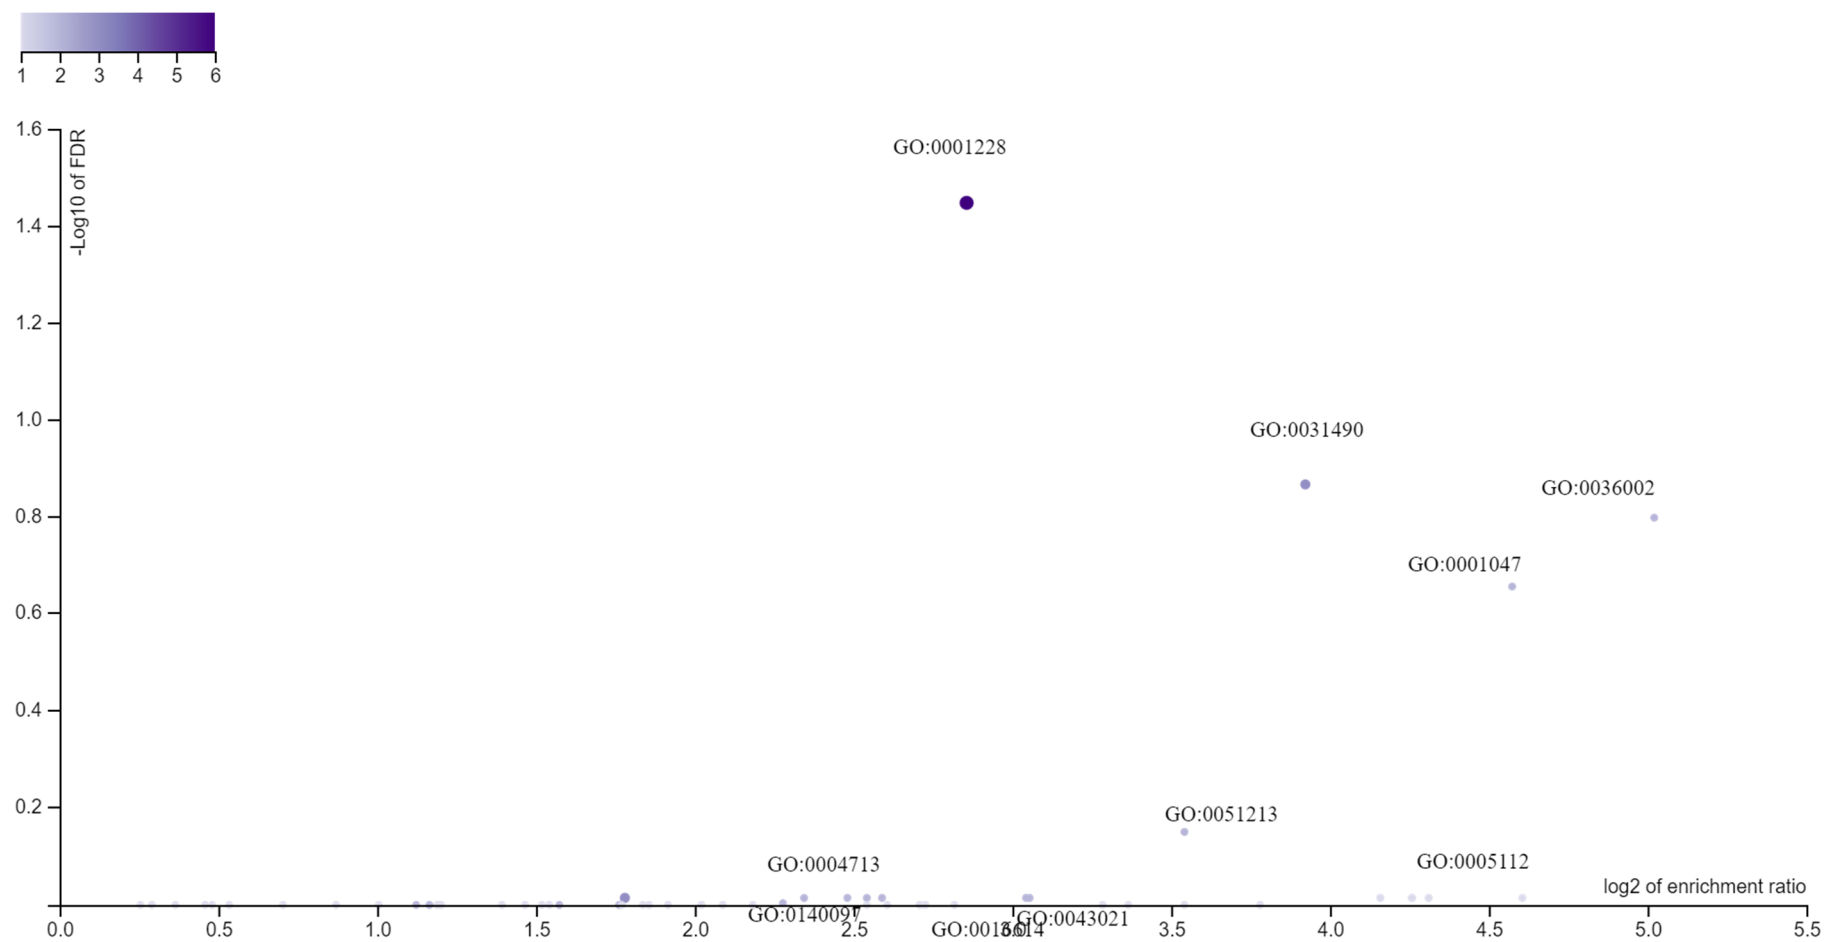

**Figure SW7.** Volcano plot depicting Molecular Function GO for the 26 genes with somatic variants

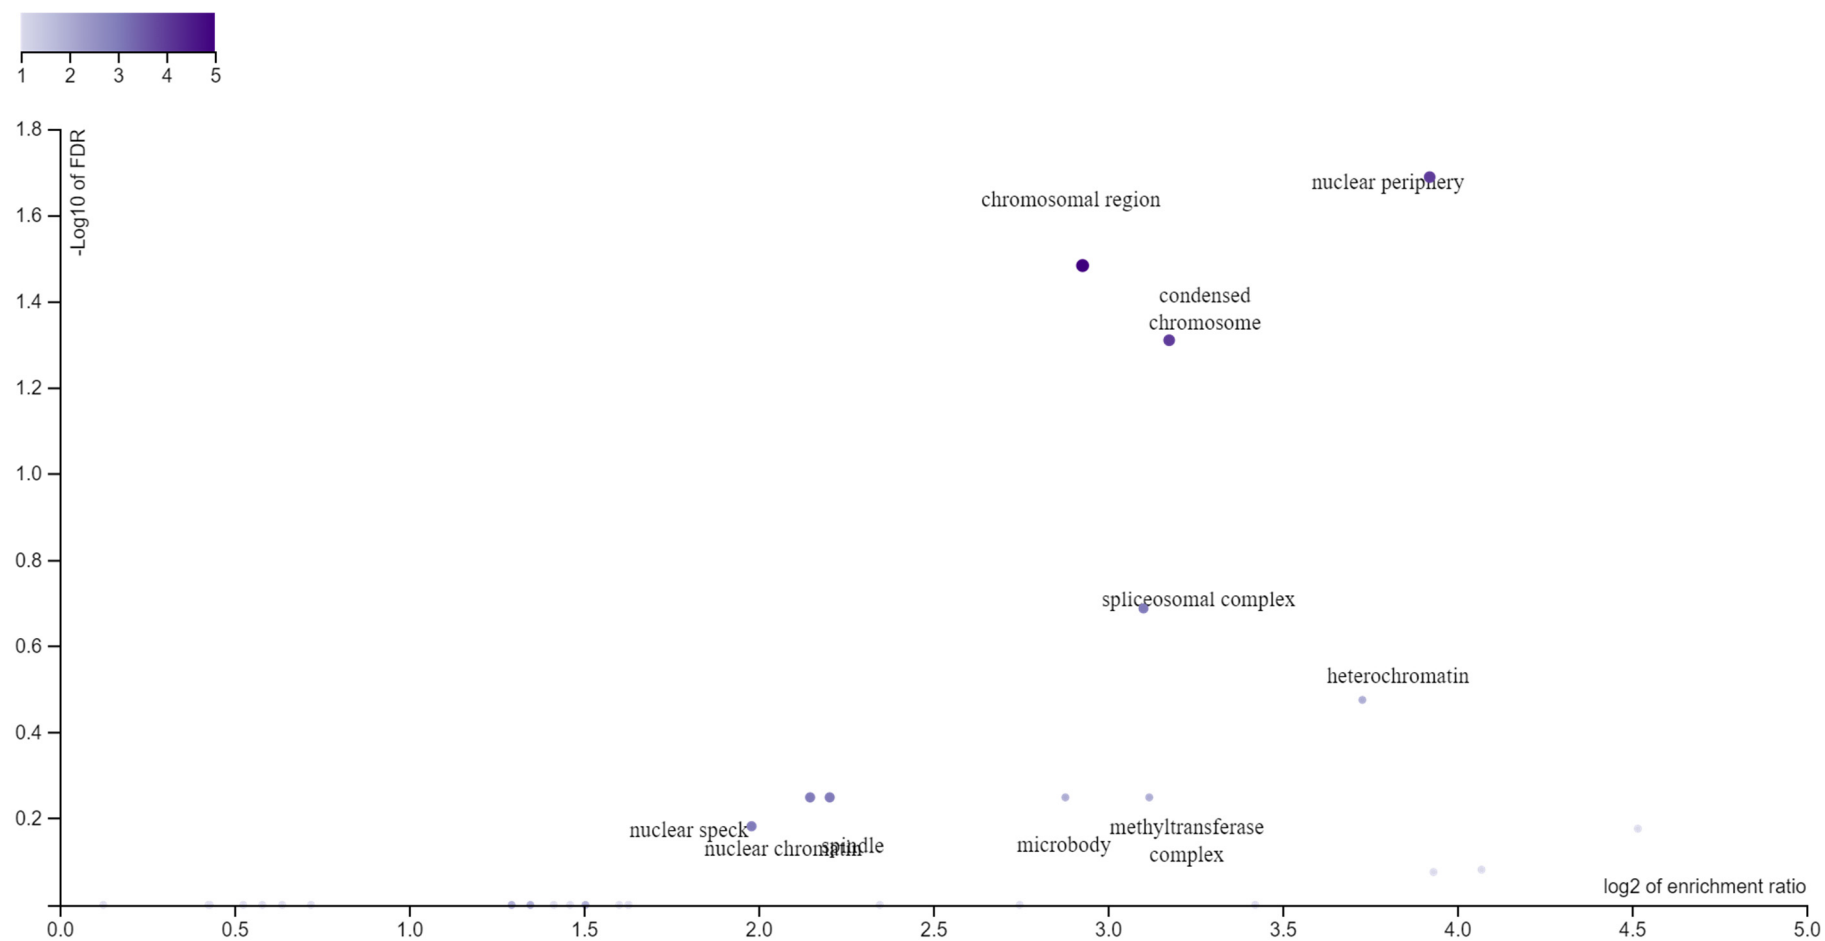

**Figure SW8.** Volcano plot depicting Cellular Component GO for the 26 genes with somatic variants

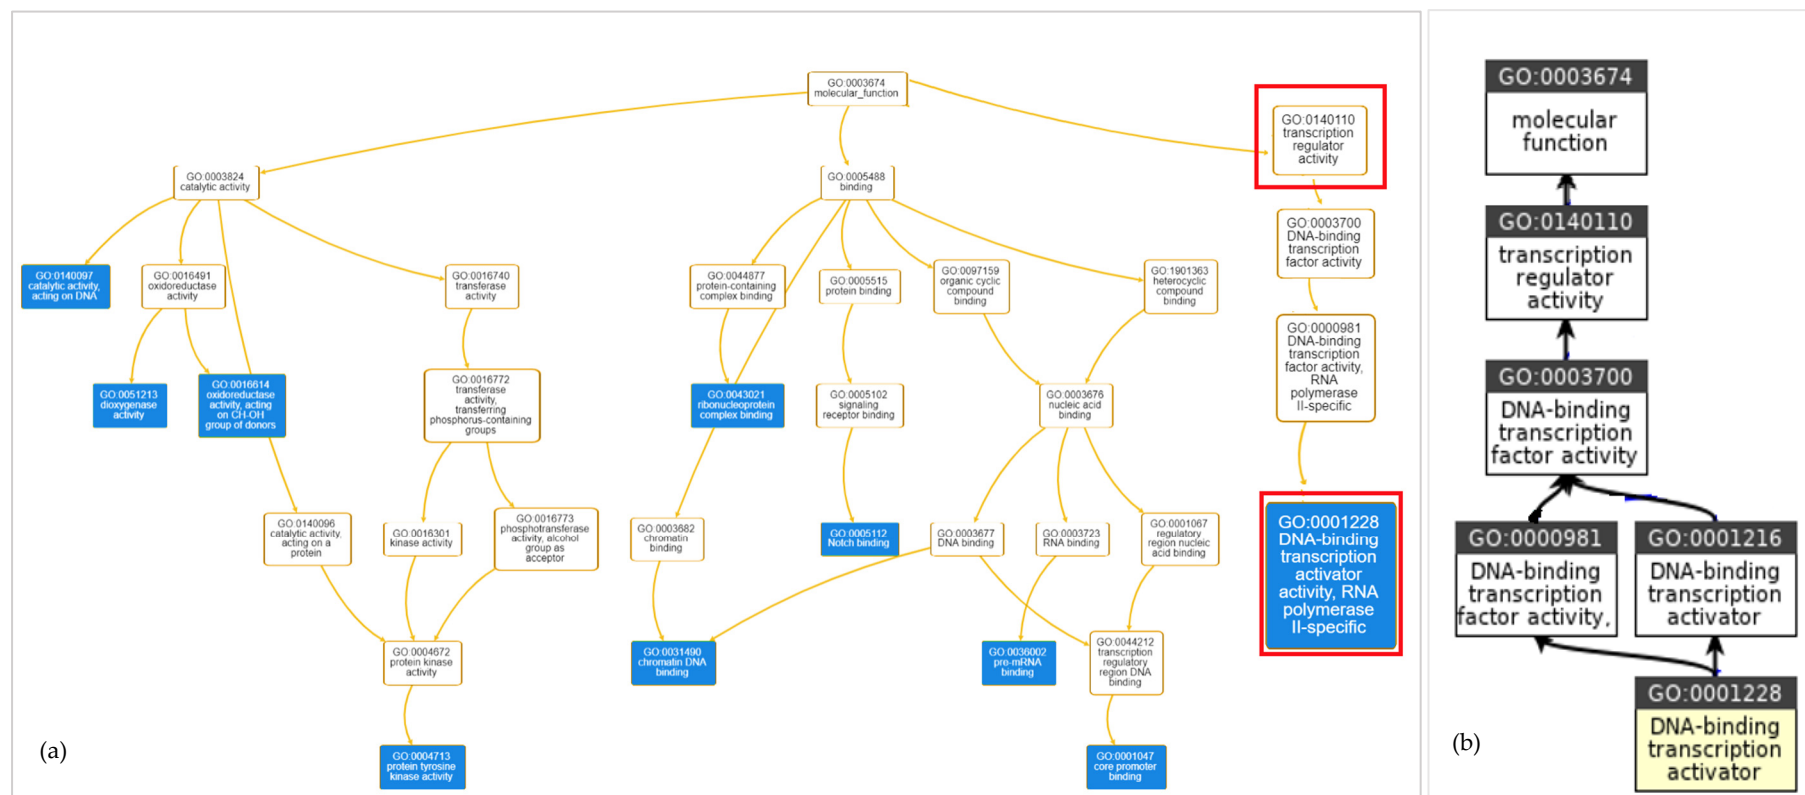

**Figure SW9.** Directed acyclic graph (DAG) (a) and Quickgo graph of the GO for MF enrichment of 26 genes somatic variants and. The branches depict the containment relationships and blue boxes indicates GO terms that are significantly over-represented in this cohort. The most the most enriched GO MF category was DNA-binding transcription activator activity, RNA polymerase II-specific (GO:0001228) ( $p < 0.01$ , FDR=0.4) as highlighted in red boxes along with ancestral GO term GO:0140110 (Transcription regulation activity).
